# Supplementary material for: Nanophotonic perovskite solar cell architecture with a three-dimensional TiO2 nanodendrite scaffold for light trapping and electron collection
Source: Royal Society of Chemistry journal article supplement (doi:10.1039/c5ta09067a), 2015-12-10
Supplement: c5ta09067a1.pdf [file c5ta09067a1.pdf]

**Electronic Supplementary Information**

**Nanophotonic Perovskite Solar Cell Architecture with  
Three-Dimensional TiO<sub>2</sub> Nanodendrite Scaffold for Light Trapping  
and Electron Collection**

Sih-Han Lin,<sup>1</sup> Yen-Hsun Su,<sup>2</sup> Hsun-Wei Cho,<sup>1</sup> Po-Yen Kung,<sup>2</sup> Wen-Pin Liao,<sup>1</sup> Jih-Jen Wu\*<sup>1</sup>

<sup>1</sup> Department of Chemical Engineering, National Cheng Kung University, Tainan 701,  
Taiwan

<sup>2</sup> Department of Materials Science and Engineering, National Cheng Kung University,  
Tainan 701, Taiwan

\*Correspondence and requests for materials should be addressed to J. W. (email:  
wujj@mail.ncku.edu.tw)

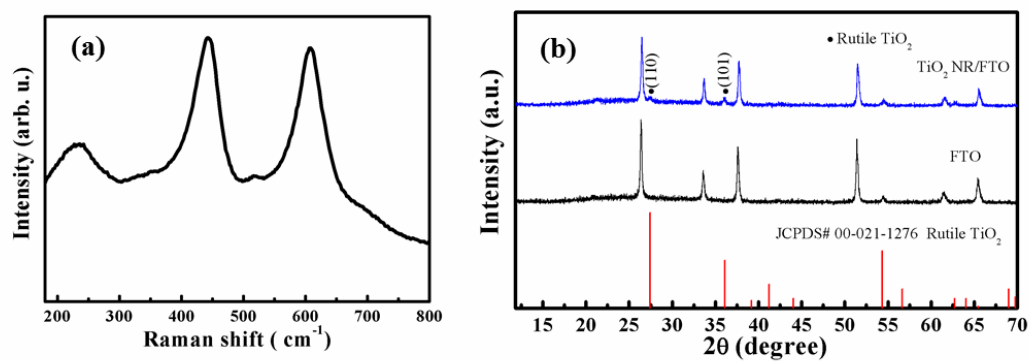

Figure S1. (a) Raman spectrum and (b) XRD pattern of  $\text{TiO}_2$  nanostructured array.

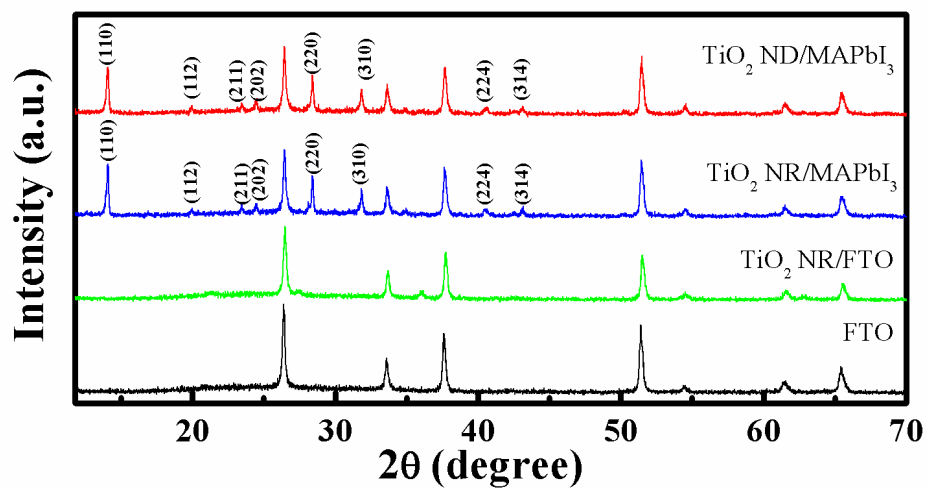

Figure S2. XRD patterns of FTO, TiO<sub>2</sub> NR array/FTO and MAPbI<sub>3</sub>-TiO<sub>2</sub> nanostructured arrays.
